# Supplementary material for: Competing antiferromagnetic orders in the double perovskite Mn2MnReO6 (Mn3ReO6)
Source: Royal Society of Chemistry journal article supplement (doi:10.1039/c6cc01290f), 2016-01-01
Supplement: c6cc01290f1.pdf [file c6cc01290f1.pdf]

## Electronic Supplementary Information for;

### Competing antiferromagnetic orders in the double perovskite $\text{Mn}_2\text{MnReO}_6$ ( $\text{Mn}_3\text{ReO}_6$ ), A. M. Arevalo-Lopez, F. Stegemann, and J. P. Attfield.

#### Experimental details

PXRD was performed with a Bruker AXS D2 Phaser diffractometer equipped with  $\text{Cu-K}_\alpha$  radiation and is shown along with the Rietveld refinement on Figure S1. Single crystal data were collected on a SuperNova X-ray Diffraction System (Oxford) and the structure was solved using the Superflip package in Jana2006. Further details are in Table S1. Magnetic properties were measured using a Quantum Design MPMS XL commercial device.

Four high pressure products were combined to give a  $\sim 70$  mg sample for neutron powder diffraction. Powder neutron diffraction profiles were recorded between  $10 < T < 200$  K at a wavelength of  $2.41 \text{ \AA}$  in high flux mode on the D20 diffractometer at ILL, Grenoble (Figure S3). Rietveld refinement was performed with the FULLPROF program. Refinement of the data at 200 K was performed using the single crystal structure as starting model.  $\text{MnO}$  phase was observed as secondary phase ( $< 3\%$  wt.) and taken into account in the structural and magnetic refinements. Lattice parameter variations are in Fig. S2.

Magnetic symmetry analysis was performed with BasIrrreps within the Fullprof suite and is summarized in Table S2. Magnetic moments were constrained in the  $ab$ -plane, as attempts to refine magnetic components along the  $c$ -axis ( $\psi_3$  or  $\psi_6$ , see Table S2) gave unstable refinements or zero magnitude within error. The best agreement with the experimental data required a combination of  $\Gamma_1$  and  $\Gamma_3$  Irreps. Constraints were needed in view of the large number of independent spin components, and the small magnitude of  $\text{Re}^{6+}$  compared to  $\text{Mn}^{2+}$  spins. The small monoclinic angle of  $\text{Mn}_2\text{MnReO}_6$  also precludes unambiguous determination of the moment directions in the  $ab$ -plane from powder data. The magnitude for the A site was constrained to be  $\sqrt{2}\mu_x = \mu_y$ , almost parallel to the  $[1\bar{1}0]$  direction, and those for the B/B' sites to be perpendicular along  $[110]$  with  $2\mu_x = \mu_y$ .

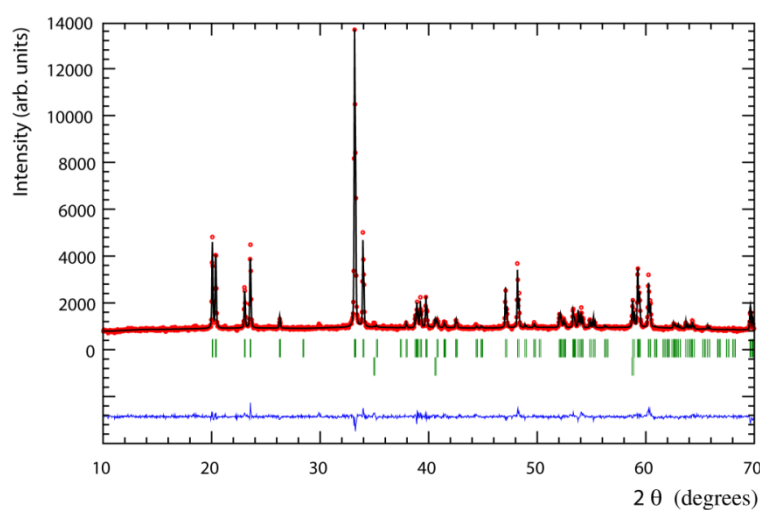

Figure S1: Laboratory powder X-ray diffraction for  $\text{Mn}_2\text{MnReO}_6$  at 300 K. Lower marks correspond to  $\text{MnO}$  ( $< 3\%$  wt.).

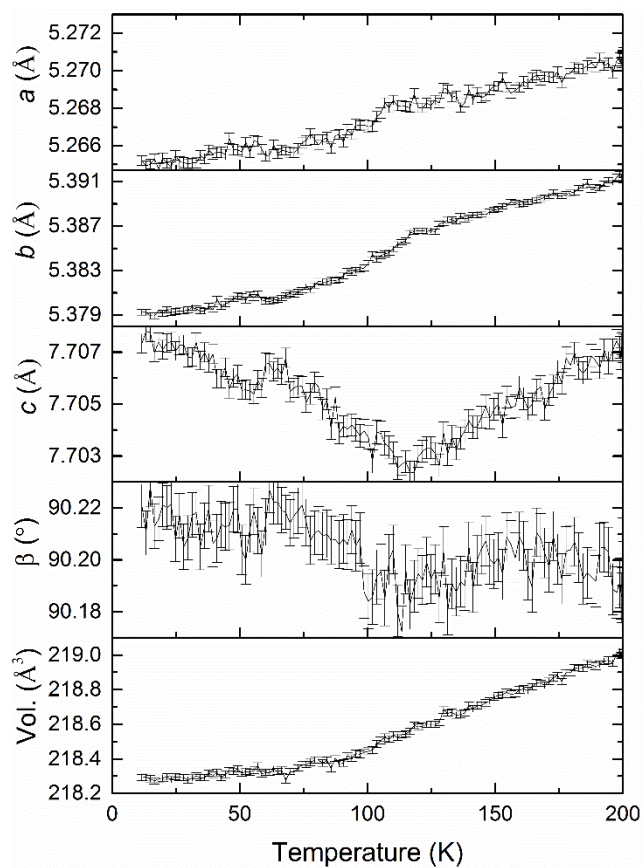

Figure S2. Plot of the lattice parameters from neutron diffraction against temperature for  $\text{Mn}_2\text{MnReO}_6$ , showing anomalies around the 99 and 109 K transitions.

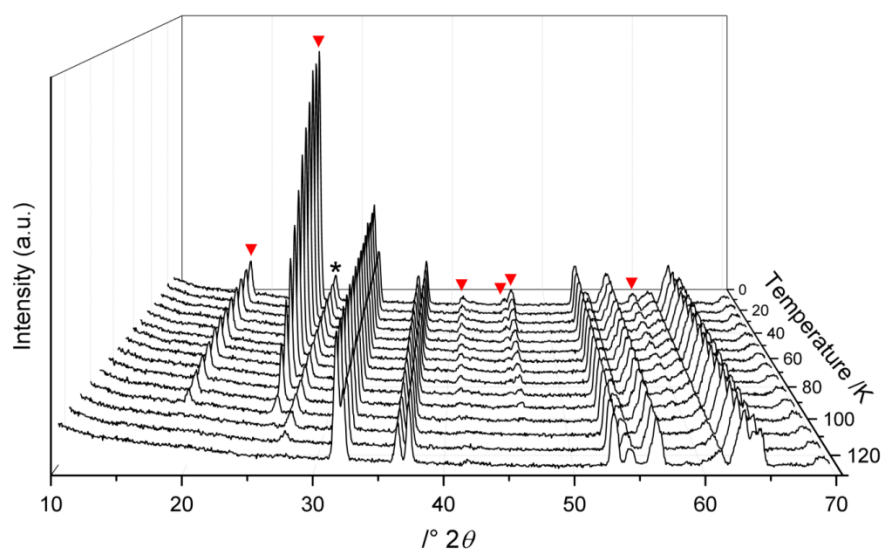

Figure S3. Thermal evolution of the NPD patterns of  $\text{Mn}_2\text{MnReO}_6$  between 10 and 130 K, red triangles mark the reflections corresponding to the perovskite, asterisk marks the magnetic MnO reflections.

**Table S1:** Crystal data and structure refinement information for  $\text{Mn}_2\text{MnReO}_6$  at  $T = 120$  K, space group  $P2_1/n$ .

|                                                  |                                                                                          |
|--------------------------------------------------|------------------------------------------------------------------------------------------|
| Molar mass ( $\text{g mol}^{-1}$ )               | 447.02                                                                                   |
| Unit cell dimensions                             | $a = 5.2708(3)$ Å<br>$b = 5.3869(4)$ Å<br>$c = 7.7100(5)$ Å<br>$\beta = 90.097(5)^\circ$ |
| Unit cell volume                                 | 218.91 Å <sup>3</sup>                                                                    |
| Calculated density ( $\text{g cm}^3$ )           | 6.7617                                                                                   |
| Crystal size ( $\mu\text{m}^3$ )                 | 60 x 50 x 30                                                                             |
| Wavelength                                       | Mo $K\alpha$ (71.073 pm)                                                                 |
| Absorption coefficient ( $\text{mm}^{-1}$ )      | 35.708                                                                                   |
| F(000)                                           | 395                                                                                      |
| $\Theta$ range /°                                | 4.62 to 29.49                                                                            |
| $hkl$ range                                      | $-7 \leq h \leq 7, -7 \leq k \leq 7, -7 \leq l \leq 7$                                   |
| total no. reflections                            | 3766                                                                                     |
| independent reflections                          | 585                                                                                      |
| data/parameters                                  | 585/52                                                                                   |
| Goodness of fit on $F^2$                         | 0.96                                                                                     |
| R1/wR2 ( $I \geq 3\sigma(I)$ )                   | 1.34/1.56                                                                                |
| R1/wR2 (all data)                                | 1.96/1.69                                                                                |
| Largest diff. peak and hole ( $e^- \text{Å}^3$ ) | 0.60/-0.50                                                                               |

**Table S2.** Symmetry analysis for  $\text{Mn}_2\text{MnReO}_6$  in  $P2_1/n$  setting with  $\mathbf{k} = (0.5 \ -0.5 \ 0)$  propagation vector. Linear combinations of the basis vectors (BV) along with the constraints responsible of the magnetic structure are also given. The coordinates are: MnA1 = (x, y, z), MnA2 = (-x+3/2, y-1/2, -z+3/2), MnA3 = (-x+1, -y+1, -z+1), MnA4 = (x+1/2, -y+3/2, z-1/2), MnB1 = (0.5, 0, 0), MnB2 = (0, 0.5, 0.5), Re1 = (0.5, 0, 0.5) and Re2 = (0, 0.5, 0). (These coordinates are shifted by (0, 0.5, 0) relative to those shown in Table 1, but this does not affect the refinement results.)

| Irreps<br>BV | $\Gamma_1$                          |                                  |                               | $\Gamma_3$                    |                     |                               |
|--------------|-------------------------------------|----------------------------------|-------------------------------|-------------------------------|---------------------|-------------------------------|
|              | $\psi_1$<br>$\mu_x$                 | $\psi_2$<br>$\mu_y$              | $\psi_3$<br>$\mu_z$           | $\psi_4$<br>$\mu_x$           | $\psi_5$<br>$\mu_y$ | $\psi_6$<br>$\mu_z$           |
| MnA1         | 1                                   | 1                                | 1                             | –                             | –                   | –                             |
| MnA2         | –                                   | –                                | –                             | -1                            | -1                  | -1                            |
| MnA3         | -1                                  | -1                               | -1                            | –                             | –                   | –                             |
| MnA4         | –                                   | –                                | –                             | -1                            | 1                   | -1                            |
| MnB1         | 1                                   | 1                                | 1                             | –                             | –                   | –                             |
| MnB2         | –                                   | –                                | –                             | 1                             | -1                  | 1                             |
| Re1          | 1                                   | 1                                | 1                             | –                             | –                   | –                             |
| Re2          | –                                   | –                                | –                             | 1                             | -1                  | 1                             |
| MnA          | $\psi_1 + \psi_2 + \psi_4 + \psi_5$ |                                  |                               | $ \psi_1  = 3.6(1) \mu_B$     |                     | $ \psi_5  = 2.5 \mu_B$        |
| MnB / ReB    | $\psi_2 + \psi_5 / \psi_1 + \psi_4$ |                                  |                               | $ \psi_{1Mn}  = 1.5(2) \mu_B$ |                     | $ \psi_{1Re}  = 0.7(2) \mu_B$ |
| constraints  |                                     |                                  |                               |                               |                     |                               |
| A site       | $ \psi_1  =  \psi_4 $               | $ \psi_2  = - \psi_5 $           | $ \psi_5  = \sqrt{2} \psi_4 $ |                               |                     |                               |
| B site       | $ \psi_1  = - \psi_4 $              | $ \psi_1  =  \psi_2  =  \psi_5 $ |                               |                               |                     |                               |
